# Supplementary material
Source: publisher figshare collection journal article supplement (https://acs.figshare.com/ndownloader/files/10635229)
Supplement: Supplementary file 1 [file 10635229]

Supporting information for:  
Competing Energy Transfer Pathways in a  
Five-Chromophore Perylene Array

Vineeth B. Yasarapudi,<sup>†</sup> Laszlo Frazer,<sup>†,§</sup> James E. A. Webb,<sup>‡</sup> Joseph K.  
Gallaher,<sup>†</sup> Alexander Macmillan,<sup>¶</sup> Alexander Falber,<sup>‡</sup> Pall Thordarson,<sup>‡</sup> and  
Timothy W. Schmidt<sup>\*,†</sup>

<sup>†</sup>*ARC Centre of Excellence in Exciton Science, School of Chemistry, UNSW Sydney, NSW  
2052, Australia.*

<sup>‡</sup>*Australian Centre for Nanomedicine and the ARC Centre of Excellence in Bio-Nano  
Science & Technology, School of Chemistry, UNSW Sydney, NSW 2052, Australia.*

<sup>¶</sup>*Mark Wainwright Analytical Centre, UNSW Sydney, NSW 2052, Australia.*

<sup>§</sup>*ARC Centre of Excellence in Exciton Science, School of Chemistry, Monash University,  
Clayton, VIC 3800, Australia.*

E-mail: [timothy.schmidt@unsw.edu.au](mailto:timothy.schmidt@unsw.edu.au)

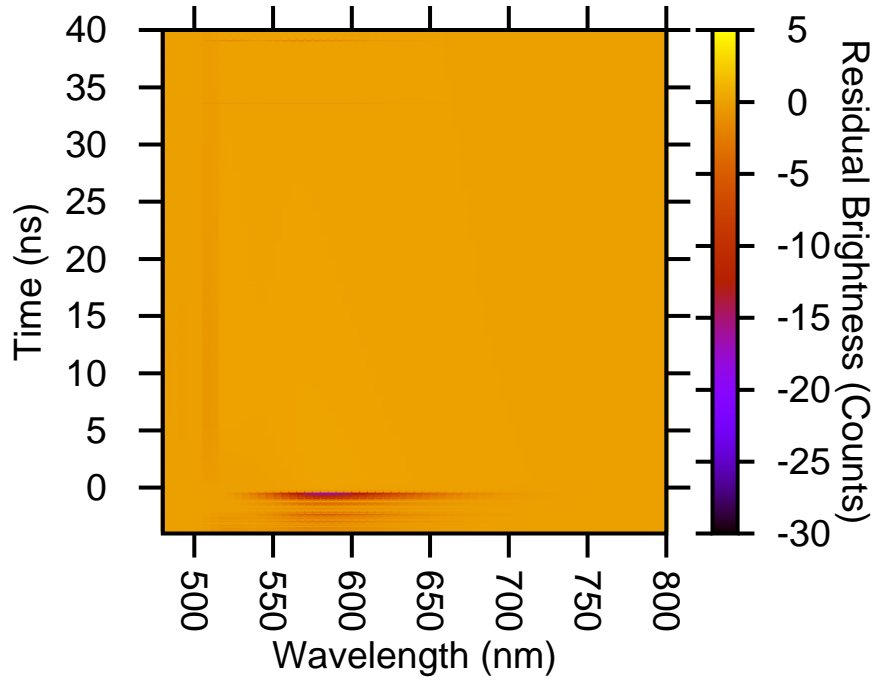

Figure S1: Residuals of the decomposition in Fig. 7 of the main text. In the data, the peak brightness per bin is  $10^4$ , so the residuals are negligible. We conclude the two component model completely describes the data.
